# Supplementary material for: Labour companionship and women’s experiences of mistreatment during childbirth: results from a multi-country community-based survey
Source: PubMed Central journal article supplement (PMC7684665; doi:10.1136/bmjgh-2020-003564), 2020-11-23
Supplement: bmjgh-2020-003564supp001.pdf [file bmjgh-2020-003564supp001.pdf]

## SUPPLEMENTARY FILE

Supplementary Table 1. Sociodemographic information and obstetric history of women with a labour companion present at any point during care by country,  $N = 1346$ 

|                                       | <b>Ghana<br/>(N=395)</b> | <b>Guinea<br/>(N=82)</b> | <b>Myanmar<br/>(N=629)</b> | <b>Nigeria<br/>(N=240)</b> | <b>Total<br/>(N=1346)</b> |
|---------------------------------------|--------------------------|--------------------------|----------------------------|----------------------------|---------------------------|
|                                       | n (%)                    | n (%)                    | n (%)                      | n (%)                      | n (%)                     |
| <b>Maternal age</b>                   |                          |                          |                            |                            |                           |
| 15-19                                 | 23 (5.8)                 | 22 (26.8)                | 38 (6.0)                   | 6 (2.5)                    | 89 (6.6)                  |
| 20-29                                 | 183 (46.3)               | 44 (53.7)                | 343 (54.5)                 | 102 (42.5)                 | 672 (49.9)                |
| 30+                                   | 189 (47.9)               | 16 (19.5)                | 248 (39.4)                 | 132 (55.0)                 | 585 (43.5)                |
| <b>Marital status</b>                 |                          |                          |                            |                            |                           |
| Currently married or cohabiting       | 332 (84.1)               | 75 (91.5)                | 611 (97.1)                 | 221 (92.1)                 | 1239 (92.1)               |
| Single <sup>1</sup>                   | 62 (15.7)                | 7 (8.5)                  | 18 (2.9)                   | 19 (7.9)                   | 106 (7.9)                 |
| Other/Do Not Know/Unknown/Missing     | 1 (0.3)                  | 0 (0.0)                  | 0 (0.0)                    | 0 (0.0)                    | 1 (0.07)                  |
| <b>Education</b>                      |                          |                          |                            |                            |                           |
| No education                          | 20 (5.1)                 | 29 (35.4)                | 15 (2.4)                   | 1 (0.4)                    | 65 (4.83)                 |
| Some primary                          | 33 (8.4)                 | 21 (25.6)                | 104 (16.5)                 | 3 (1.3)                    | 161 (12.0)                |
| Primary                               | 144 (36.5)               | 17 (20.7)                | 183 (29.1)                 | 19 (7.9)                   | 363 (27.0)                |
| Secondary                             | 125 (31.7)               | 6 (7.3)                  | 192 (30.5)                 | 96 (40.0)                  | 419 (31.1)                |
| Post-secondary/tertiary               | 56 (14.2)                | 5 (6.1)                  | 135 (21.5)                 | 119 (49.6)                 | 315 (23.4)                |
| Vocational/Other/Unknown              | 17 (4.3)                 | 4 (4.9)                  | 0 (0.0)                    | 2 (0.8)                    | 23 (1.7)                  |
| <b>Number of previous births</b>      |                          |                          |                            |                            |                           |
| 1                                     | 277 (70.1)               | 73 (89.0)                | 353 (56.1)                 | 103 (42.9)                 | 806 (59.9)                |
| 2 or 3                                | 80 (20.3)                | 5 (6.1)                  | 228 (36.2)                 | 98 (40.8)                  | 411 (30.5)                |
| 4+                                    | 35 (8.9)                 | 4 (4.9)                  | 47 (7.5)                   | 39 (16.3)                  | 125 (9.3)                 |
| Unknown                               | 3 (0.8)                  | 0 (0.0)                  | 1 (0.2)                    | 0 (0.0)                    | 4 (0.3)                   |
| <b>Number of previous pregnancies</b> |                          |                          |                            |                            |                           |
| 1                                     | 98 (24.8)                | 27 (32.9)                | 323 (51.4)                 | 69 (28.8)                  | 517 (38.4)                |
| 2 or 3                                | 170 (43.0)               | 29 (35.4)                | 245 (39.0)                 | 112 (46.7)                 | 556 (41.3)                |
| 4+                                    | 124 (31.4)               | 26 (31.7)                | 60 (9.6)                   | 59 (24.6)                  | 269 (20.0)                |
| Unknown                               | 3 (0.8)                  | 0 (0.0)                  | 0 (0.0)                    | 0 (0.0)                    | 3 (0.2)                   |
| <b>Singleton pregnancy</b>            |                          |                          |                            |                            |                           |
| Yes                                   | 387 (98.0)               | 80 (97.6)                | 619 (98.4)                 | 235 (97.9)                 | 1321 (98.1)               |
| No (Twins/Multiple Birth)             | 8 (2.0)                  | 2 (2.4)                  | 10 (1.6)                   | 5 (2.1)                    | 25 (1.9)                  |
| <b>Currently breastfeeding</b>        |                          |                          |                            |                            |                           |
| Yes                                   | 385 (97.5)               | 79 (96.3)                | 614 (97.6)                 | 237 (98.8)                 | 1315 (97.7)               |
| <b>Breast feeding initiation</b>      |                          |                          |                            |                            |                           |
| <1 hour                               | 192 (49.6)               | 50 (63.3)                | 442 (71.4)                 | 99 (41.4)                  | 783 (59.1)                |
| >1 hour but <24 hours                 | 144 (37.2)               | 26 (32.9)                | 121 (19.6)                 | 103 (43.1)                 | 394 (29.8)                |
| >24 hours                             | 51 (13.2)                | 3 (3.8)                  | 56 (9.1)                   | 37 (15.5)                  | 147 (11.1)                |

<sup>1</sup>Single, separated, divorced or widowed

Supplementary Table 2. Mistreatment among women with absence of a labour companion during care by country, N=1317<sup>1</sup>

|                                                                                             | <b>Ghana<br/>(N=437)</b> | <b>Guinea<br/>(N=560)</b> | <b>Nigeria<br/>(N=320)</b> | <b>Total<br/>(N=1317)</b> |
|---------------------------------------------------------------------------------------------|--------------------------|---------------------------|----------------------------|---------------------------|
|                                                                                             | n (%)                    | n (%)                     | n (%)                      | n (%)                     |
| Any physical abuse, verbal abuse, or stigma and discrimination*                             | 152 (34.8)               | 221 (39.5)                | 160 (50.0)                 | 532 (40.4)                |
| Any physical abuse*                                                                         | 19 (4.4)                 | 119 (21.3)                | 51 (15.9)                  | 189 (14.3)                |
| Any verbal abuse*                                                                           | 141 (32.3)               | 161 (28.8)                | 145 (45.3)                 | 447 (33.9)                |
| Any stigma or discrimination*                                                               | 15 (3.4)                 | 8 (1.4)                   | 17 (5.3)                   | 40 (3.0)                  |
| <b>Informed consent for procedures</b>                                                      |                          |                           |                            |                           |
| C-section*                                                                                  | 52 (11.9)                | 58 (10.4)                 | 11 (3.4)                   | 121 (9.2)                 |
| Non-consented*                                                                              | 15 (28.9)                | 4 (6.9)                   | 1 (9.1)                    | 20 (16.5)                 |
| Missing                                                                                     | 9 (17.3)                 | 1 (1.7)                   | 3 (27.3)                   | 13 (10.7)                 |
| Episiotomy <sup>2</sup> *                                                                   | 48 (11.0)                | 46 (8.2)                  | 83 (25.9)                  | 177 (13.4)                |
| Non-consented*                                                                              | 19 (42.2)                | 35 (77.8)                 | 33 (39.8)                  | 87 (50.3)                 |
| Missing                                                                                     | 9 (20.0)                 | 2 (4.4)                   | 9 (10.8)                   | 20 (11.5)                 |
| Induction of labour*                                                                        | 40 (9.2)                 | 2 (0.4)                   | 26 (8.1)                   | 68 (5.2)                  |
| Non-consented                                                                               | 11 (27.5)                | 1 (50.0)                  | 2 (7.7)                    | 14 (20.6)                 |
| Missing                                                                                     | 3 (7.5)                  | 0 (0.0)                   | 1 (3.9)                    | 4 (5.8)                   |
| Vaginal examination*                                                                        | 427 (97.7)               | 537 (95.9)                | 312 (97.5)                 | 1276 (96.8)               |
| Non-consented *                                                                             | 239 (55.9)               | 278 (51.8)                | 184 (58.9)                 | 701 (54.9)                |
| Missing                                                                                     | 10 (2.3)                 | 2 (0.4)                   | 3 (1.0)                    | 15 (1.2)                  |
| <b>Communication</b>                                                                        |                          |                           |                            |                           |
| Woman felt that health workers or staff did not listen and respond to her concerns*         | 71 (16.3)                | 100 (17.9)                | 41 (12.8)                  | 212 (16.1)                |
| Missing                                                                                     | 5 (1.1)                  | 3 (0.5)                   | 8 (2.5)                    | 16 (1.2)                  |
| <b>Neglect and abandonment</b>                                                              |                          |                           |                            |                           |
| Staff member not present when the baby came out                                             | 14 (3.2)                 | 2 (0.4)                   | 9 (2.8)                    | 25 (1.9)                  |
| Missing                                                                                     | 0                        | 2 (0.4)                   | 2 (0.6)                    | 4 (0.3)                   |
| Woman waited for long periods of time before attended by health workers*                    | 178 (40.7)               | 66 (11.8)                 | 43 (13.4)                  | 287 (21.8)                |
| Missing                                                                                     | 1 (0.2)                  | 1 (0.2)                   | 0                          | 2 (0.2)                   |
| Woman felt ignored, neglected, or that presence was a nuisance for health workers or staff* | 64 (14.7)                | 62 (11.1)                 | 65 (20.3)                  | 191 (14.5)                |
| Missing                                                                                     | 0                        | 3 (0.5)                   | 0                          | 4 (0.3)                   |
| <b>Pain relief</b>                                                                          |                          |                           |                            |                           |
| Requested pain relief*                                                                      | 61 (14.0)                | 183 (32.7)                | 34 (10.6)                  | 278 (21.1)                |
| Missing                                                                                     | 7 (1.5)                  | 0                         | 1 (0.3)                    | 8 (0.6)                   |
| Did not receive pain relief*                                                                | 19 (31.2)                | 120 (65.6)                | 14 (41.2)                  | 153 (55.0)                |
| Missing                                                                                     | 21 (34.4)                | 1 (0.6)                   | 0                          | 22 (7.9)                  |

\* $P < 0.05$

<sup>1</sup>Myanmar not included because 99.7% of women reported having a labour companion present

<sup>2</sup>Among women with vaginal birth only
